# Supplementary material for: Improved stability of liposome-stabilized emulsions as a co-encapsulation delivery system for vitamin B2, vitamin E and β-carotene
Source: Royal Society of Chemistry journal article supplement (doi:10.1039/d1fo03617c), 2022-01-01
Supplement: d1fo03617c1.pdf [file d1fo03617c1.pdf]

Supplementary data

Table S1 The encapsulation efficiencies (EEs) of liposomes with different adding amounts of vitamin E and vitamin B<sub>2</sub> (the amount of phospholipid was fixed at 400 mg)

|                                                                   |    | The EE of<br>vitamin B <sub>2</sub> (%) | The EE of<br>vitamin E (%) |
|-------------------------------------------------------------------|----|-----------------------------------------|----------------------------|
| The adding amount of vitamin B <sub>2</sub><br>(mg)               | 10 | 37.60 ± 0.06                            | 42.90 ± 0.07               |
| (The adding amount of vitamin E<br>was set at 10 mg)              | 20 | 54.11 ± 0.05                            | 65.34 ± 0.06               |
|                                                                   | 30 | 39.41 ± 0.13                            | 65.52 ± 0.06               |
| The adding amount of vitamin E<br>(mg)                            | 5  | 52.04 ± 0.10                            | 56.74 ± 0.04               |
| (The adding amount of vitamin B <sub>2</sub><br>was set at 20 mg) | 10 | 54.94 ± 0.03                            | 66.65 ± 0.23               |
|                                                                   | 15 | 52.75 ± 0.08                            | 61.25 ± 0.13               |

Table S2 The encapsulation efficiencies (EEs) of emulsion stabilized by freshly-prepared liposomes with different adding amounts of β-carotene

| The adding amount of β-<br>carotene (mg) | The EE of β-carotene (%) |
|------------------------------------------|--------------------------|
| 10                                       | 44.64 ± 0.09             |
| 20                                       | 61.94 ± 0.08             |
| 30                                       | 59.76 ± 0.16             |
